# Supplementary material for: Anti-tax interacting protein-1 (TIP-1) monoclonal antibody targets human cancers
Source: PubMed Central journal article supplement (PMC5190028; doi:10.18632/oncotarget.9713), 2016-05-30
Supplement: oncotarget-07-43352-s001.pdf [file oncotarget-07-43352-s001.pdf]

## Anti-tax interacting protein-1 (TIP-1) monoclonal antibody targets human cancers

### Supplementary Materials

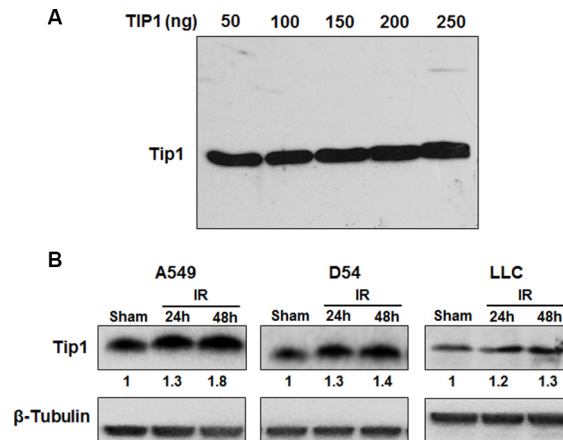

**Supplementary Figure S1: Specificity of the 2C6F3 antibody.** (A) 2C6F3 specifically binds to TIP-1. Various concentrations of recombinant TIP-1 as indicated was immunoblotted with 25 ng TIP-1 monoclonal antibody 2C6F3. (B) A549, D54, and LLC cells were irradiated with 3 Gy. At 24 h and 48 h after irradiation, total cellular proteins were analyzed for levels of TIP-1 expression. The blots were also immunoblotted with a  $\beta$ -tubulin antibody for loading control.
